# Supplementary material for: Obstacles and Solutions Driving the Development of a National Teleradiology Network
Source: MDPI journal article supplement (doi:10.3390/healthcare9121684), 2021-12-06
Supplement: s1 [file s1]

---

Suppl. Table S1. Summary of teleradiology hospitals in 2020.

| Site  | Size (number of beds) | Level of care                  |
|-------|-----------------------|--------------------------------|
| #1,2  | 387                   | basic /intermediate            |
| #3    | 171                   | basic                          |
| #4,5  | 270                   | basic                          |
| #6    | 170                   | basic                          |
| #7    | 165                   | basic                          |
| #8    | 55                    | basic                          |
| #9    | 140                   | basic                          |
| #10   | 250                   | intermediate                   |
| #11   | 100                   | basic                          |
| #12   | 245                   | intermediate                   |
| #13   | 90                    | basic                          |
| #14   | 96                    | basic                          |
| #15   | 306                   | intermediate/teaching hospital |
| #16   | 132                   | basic                          |
| #17   | 134                   | basic                          |
| #18   | 186                   | basic                          |
| #19   | 267                   | intermediate                   |
| #20   | 60                    | basic                          |
| #21   | 263                   | intermediate                   |
| #22   | 30                    | basic                          |
| #23   | 661                   | teaching hospital              |
| Total | 4.178                 |                                |

---

Suppl. Table S2. Semi-Structured interview questions and individual responses of four senior staff members.

| Question | Individual 1                                                                                                                                                                                                                                                                                                                                                                       | Individual 2                                                                                                                                                                                                                                                                                                       | Individual 3                                                                                                                                                                                                                                                                                                                                                                                                      | Individual 4                                                                                                                                                                                                                                                                                                                                    |
|----------|------------------------------------------------------------------------------------------------------------------------------------------------------------------------------------------------------------------------------------------------------------------------------------------------------------------------------------------------------------------------------------|--------------------------------------------------------------------------------------------------------------------------------------------------------------------------------------------------------------------------------------------------------------------------------------------------------------------|-------------------------------------------------------------------------------------------------------------------------------------------------------------------------------------------------------------------------------------------------------------------------------------------------------------------------------------------------------------------------------------------------------------------|-------------------------------------------------------------------------------------------------------------------------------------------------------------------------------------------------------------------------------------------------------------------------------------------------------------------------------------------------|
| #1       | director                                                                                                                                                                                                                                                                                                                                                                           | Deputy director (radiologist and computer scientist)                                                                                                                                                                                                                                                               | Senior physician, head of staff unit "Teleradiology" (radiologist)                                                                                                                                                                                                                                                                                                                                                | x-ray technician, member of staff unit "Teleradiology"                                                                                                                                                                                                                                                                                          |
| #2       | 1997                                                                                                                                                                                                                                                                                                                                                                               | 1997                                                                                                                                                                                                                                                                                                               | 1997                                                                                                                                                                                                                                                                                                                                                                                                              | 2004                                                                                                                                                                                                                                                                                                                                            |
| #3       | 2003 after affiliation to smaller hospitals without sufficient coverage by radiologists                                                                                                                                                                                                                                                                                            | 2004 when the first hospital was to be connected                                                                                                                                                                                                                                                                   | 2004 when the first hospital was to be connected                                                                                                                                                                                                                                                                                                                                                                  | 2005 as x-ray technician with bookings                                                                                                                                                                                                                                                                                                          |
| #4       | (1) Digitalization of imaging<br>(2) Increasing network capacity<br>(3) Increasing standardization (DICOM, HL7)<br>(4) Increasing knowledge of regulating authorities, laws                                                                                                                                                                                                        | (1) Connection of the first hospital<br>(2) Connection of the first hospital with full integration of RIS/PACS, prior digitalization<br>(3) development of first regulatory standards in Teleradiology with authorities<br>(4) switch from weekly on-site conferences to videoconferencing→less staff requirements | (1) Connection of the first hospital without external support<br>(2) Faster transmission rates (SDSL)<br>(3) Videoconferencing                                                                                                                                                                                                                                                                                    | (1) Digitalization of imaging<br>(2) Implementation of RIS with multi-client capability<br>(3) Videoconferencing                                                                                                                                                                                                                                |
| #5       | - slow data transmission<br>- incomprehension of management boards of potential sites<br>- price negotiations<br>- competition through radiology practices involved in in- and outpatient patient care                                                                                                                                                                             | - slow data transmission<br>- missing multi-client capability<br>- differing workflows for hospitals with individual RIS                                                                                                                                                                                           | - slow data transmission<br>- local radiologists with different workflows<br>- need for continuous guidance of technicians and clinicians (especially at sites without local radiologist)                                                                                                                                                                                                                         | - great variability of technical systems at sites<br>- differing workflows<br>- complexity of teleradiology network<br>- initial costs                                                                                                                                                                                                          |
| #6       | - radio-relay systems (partial success, in some areas still imperfect transmission)<br>- personal contacts/dialogue (success)<br>- increasing personal experience (success)<br>- employment of a Medical physics Expert and dose-management software (success)<br>- precedent-setting (success)<br>- focus on eastern parts of Germany→less (partial success, two sites were lost) | - switch from ISDN to SDSL for quicker transmission (partial success, in some areas still imperfect transmission)<br>- next generations of PACS and RIS (success)<br>- home-tailored program with HL7 ORM to harmonize workflow between different RIS (success), then next generation RIS                          | - switch from ISDN to SDSL for quicker transmission (partial success, in some areas still imperfect transmission)<br>- recurrent personal visits and exchange with local radiologists / complete acquisition of radiologies for continuous routine and emergency coverage (success)<br>- recurrent trainings of staff and conferences at sites during personal visits especially in absence of local radiologists | - specific talents/skills/education of staff concerning technical aspects (success)<br>- dedicated contact person for external staff→stepwise alignment of workflows (success)<br>- close cooperation of radiology department and local IT specialists (success)<br>- sale of digital x-ray equipment from ukb to teleradiology sites (success) |
| #7       | - PACS and RIS architecture →multi-client capability, guaranteed data protection                                                                                                                                                                                                                                                                                                   | - compressed image transmission (wavelet)<br>- SDSL<br>- PACS and RIS with multi-client capability                                                                                                                                                                                                                 | - DICOM and HL7 standards<br>- SDSL<br>- digitalization<br>- PACS and RIS with multi-client capability                                                                                                                                                                                                                                                                                                            | - RIS with multi-client capability →full integration with data protection<br>- videoconferencing →omission of high-frequency personal visits                                                                                                                                                                                                    |

---

#8

- support/ prioritization by artificial intelligence
- innovative communication platforms to replace numerous phone calls
- adaptation of salary law to account for time-consuming multilateral communication

- complete acquisition of most sites from counseling/indication to radiology report and recommendations in case of transfers
- complete functionality in home offices→rectification, growth, anticipation of situations like pandemic

- systems focusing on radiologists
- artificial intelligence for problem analysis, management of cases

- Monitoring of the network possibly based on artificial intelligence to detect malfunctions
-
